# Supplementary material for: Extraction and Identification of Antioxidant Ingredients from Cyclocarya paliurus (Batal.) Iljinsk Using UHPLC-Q-Orbitrap-MS/MS-Based Molecular Networking
Source: Hindawi journal article supplement (doi:10.1155/2022/8260379), 2022-12-26
Supplement: f1 [file 8260379.f1.docx]

Supplementary Material

Extraction and Identification of Antioxidant Ingredients from *Cyclocarya paliurus* (Batal.) Iljinsk. using UHPLC-Q-Orbitrap-MS/MS based Molecular Networking

Yingpeng Tong1,2, Xin Li2, Ziping Zhu2, Ting Wang1, Qi Zhou1, Na Li2, Zhenda Xie1, Chunxiao Jiang1, Junmin Li1,2,*, Jianxin Wang1,3,4,*

1 School of Advanced Study, Taizhou University, Taizhou, 318000, China

2 Zhejiang Provincial Key Laboratory of Evolutionary Ecology and Conservation, Taizhou University, Taizhou 318000, China

3 Department of Pharmaceutics, School of Pharmacy, Fudan University & Key Laboratory of Smart Drug Delivery, Ministry of Education, Shanghai 201203, China

4 Institute of Integrative Medicine, Fudan University, Shanghai 201203, China

* Correspondence: lijmtzc@126.com (Junmin Li); jxwang@fudan.edu.cn (Jianxin Wang)

Table S1. Peak assignments for ingredients in the antioxidant extraction of LCP.

| No. | RT(min) | precursor mass | Adduct | MS/MS | identification | Compound class |
| --- | --- | --- | --- | --- | --- | --- |
| 1 | 1.38 | 371.0988 | [M-H]- | 109.0286(4.24), 111.0079(2.7), 111.0444(6.57), 123.0439(5.8), 127.0392(2.41), 135.0444(100), 136.0481(8.53), 173.0452(19.76), 191.0558(66.98), 192.059(4.93), 371.1004(4.44) | caffeoyl-hydroxymethyl-glucuronide | D |
| 2 | 1.74 | 353.0882 | [M-H]-, [2M-H]-, [3M-H]- | 107.0495(3.47), 109.0284(2.16), 111.0443(2.95), 117.0337(2), 127.0394(4.71), 133.029(3.01), 134.0366(13.47), 135.0445(100), 136.0478(9.64), 161.0239(4.1), 173.0449(2.8), 179.0347(25.17), 180.0389(2.22), 191.0558(85.51), 192.0592(8.83), 353.0886(2.8) | 5-caffeoyl quinic acid | D |
| 3 | 2.04 | 341.0882 | [M-H]- | 101.0235(4.23), 109.029(4.35), 133.0288(34.03), 134.0373(9.1), 135.0444(100), 136.0477(10.96), 137.0236(4.29), 147.0444(3.83), 148.052(4.55), 149.0602(23.08), 161.0239(72.79), 162.0277(8.66), 177.0553(22.14), 179.0346(40.88), 221.0452(15.96), 281.0663(10.2), | caffeoyl glucose | A |
| 4 | 2.04 | 503.1413 | [M-H]- | 101.0235(5.88), 133.0288(30.92), 135.0444(63.95), 136.048(6.12), 149.0603(14.4), 161.024(100), 162.0268(14.02), 177.0559(12.46), 179.0346(33.36), 191.0562(6.42), 221.0459(12.26), 281.0675(7.07), 341.0895(5.9), 383.1002(5.86), 503.1397(6.72), | caffeoyl glucose-glucose | A |
| 5 | 2.50 | 353.0882 | [M-H]-, [2M-H]- | 109.0286(2.34), 111.0441(3.95), 127.0396(5.33), 133.0288(1.95), 134.0365(4.06), 135.0444(37.32), 136.0478(4.63), 155.0344(2.06), 161.024(4.79), 173.0452(13.38), 179.0346(9.21), 191.0558(100), 192.0592(7.59), 353.0884(2.45) | chlorogenic acid | D |
| 6 | 2.69 | 179.0345 | [M-H]- | 105.2423(0.94), 107.0494(3.57), 108.0209(1.3), 109.029(1.3), 113.09(1.1), 117.0339(1.05), 132.237(0.94), 134.0368(14.09), 135.0445(90.36), 136.0477(8.44), 137.0238(21.2), 179.0344(7.74), 181.014(3.72) | caffeic acid | A |
| 7 | 3.02 | 325.0934 | [M-H]- | 101.0234(5.89), 117.0339(35.42), 119.0494(100), 120.0528(8.7), 123.0445(3.16), 132.0573(6.52), 133.0651(20.39), 135.045(3.27), 145.0288(99.16), 146.0325(10.61), 161.0604(27.65), 163.0394(31.74), 176.0481(12.69), 205.05(14.69), 265.0726(9.5), 309.5496(3.22), | coumaroyl glucose | B |
| 8 | 3.45 | 337.0935 | [M-H]- | 111.0444(18.49), 115.0541(10.62), 119.0494(65.15), 135.0444(16.52), 137.0235(8.54), 145.0282(8.19), 149.06(15.32), 159.0447(25.08), 161.0236(16.64), 163.0397(23.84), 173.0452(100), 191.055(42.33), 287.1311(7.72), 341.1677(9.36) | 4-coumaroyl quinic acid | D |
| 9 | 3.57 | 325.0934 | [M-H]- | 117.0338(35.62), 119.0495(91.13), 120.053(11.76), 132.0574(3.56), 133.0653(17.4), 134.0367(12.18), 145.0288(100), 146.0323(8.6), 161.0239(3.28), 161.0605(25.18), 163.0395(33.88), 164.043(4.34), 177.0556(5.61), 205.0502(10.51), 235.0611(5.07), 265.0725(13.17), | coumaroyl glucose | B |
| 10 | 3.77 | 353.0883 | [M-H]- | 109.0291(1.64), 111.0443(1.86), 127.0396(6.06), 133.0291(2.34), 134.0368(7.87), 135.0445(1.6), 160.0161(5.59), 161.0242(3), 171.0305(1.4), 173.0451(1.87), 175.0396(3.68), 176.0481(2.16), 191.0559(100), 192.0596(7.74), 235.0614(1.71) | 1-caffeoyl quinic acid | D |
| 11 | 4.15 | 337.0935 | [M-H]- | 111.044(7.07), 119.0493(28.6), 120.0528(3.39), 127.0396(4.39), 129.0192(2.28), 137.0239(2.88), 163.0399(10.99), 173.0453(19.68), 191.0558(100), 192.0582(7.08) | 1-coumaroyl quinic acid | D |
| 12 | 5.35 | 367.104 | [M-H]- | 111.0443(11), 117.0339(9.53), 127.0394(5.4), 134.0367(67), 134.0465(4.19), 137.0239(5.15), 173.0451(38.31), 191.0557(94.37), 192.0591(7.19), 193.0506(17.48) | 3-feruloyl quinic acid | D |
| 13 | 5.63 | 593.1521 | [M-H]- | 116.742 (2.66), 154.5821 (2.76), 183.0449 (5.84), 191.0555 (4.2), 211.0397 (3.48), 213.0558 (3.33), 220.7734 (2.88), 227.0354 (8.92), 255.0304 (56.28), 256.0337 (10.42), 283.0253 (79.05), 284.0298 (14.11), 285.0408 (100), 286.0445 (17.63), 367.1983 (3.09), 446.087 (5.55), 447.0919 (7.9), 593.1501 (7.54), 594.254 (3.06) | Kaempferol-7-*O*-glucoside-*O*-rhamnoside | C |
| 14 | 6.06 | 479.0836 | [M-H]- | 107.013 (4.21), 124.0155 (7.17), 137.024 (4.71), 151.0033 (11.15), 164.0112 (5.1), 178.9983 (7.68), 214.0271 (18.35), 215.0327 (3.67), 242.022 (13.41), 243.0302 (8.63), 259.0256 (16.03), 270.0171 (11.94), 271.0253 (77.93), 272.0283 (11.8), 287.0201 (45.65), 288.0239 (8.49), 316.0229 (100), 317.0278 (28.73), 479.0837 (23.23), 480.0867 (4.4) | Myricetin-3-*O*-glucoside | C |
| 15 | 6.40 | 493.063 | [M-H]- | 107.013 (35.25), 109.0286 (30.91), 125.0239 (11.74), 137.0237 (58.67), 151.0031 (100), 152.0068 (6.01), 163.0031 (10.63), 165.0189 (5.28), 178.9984 (44.44), 199.0402 (6.65), 227.0349 (7.01), 243.031 (5.73), 261.0396 (5.42), 271.025 (14.32), 317.0307 (78.25), 318.0345 (11.45), 493.062 (10.03) | myricetin-7-*O*-glucuronide | C |
| 16 | 6.42 | 337.0934 | [M-H]- | 109.0286(1.51), 111.0445(2), 114.4004(0.97), 117.0338(1.42), 119.0493(4.48), 127.0392(5.55), 163.0397(1.86), 173.0455(2.13), 191.0559(100), 192.0589(7.82) | 3-coumaroyl quinic acid | D |
| 17 | 7.83 | 515.1201 | [M-H]- | 109.0286(75.02), 111.0444(9.44), 135.044(29.34), 145.029(26.57), 161.0242(10.75), 161.0604(22.62), 173.0449(12.83), 179.0349(16.12), 187.0395(20.1), 191.0557(100), 192.0601(10.08), 255.0659(6.45), 279.0303(9.2), 281.0453(12.72), 297.0774(11.53), 515.1214(35.92) | 1,3-di-caffeoyl quinic acid | D |
| 18 | 10.18 | 463.089 | [M-H]- | 101.0236 (25.75), 117.5108 (9.47), 125.0237 (10.87), 151.0027 (19.53), 203.5124 (9.82), 214.0259 (14.05), 224.146 (10.28), 260.797 (9.48), 271.025 (79.26), 287.0208 (44.13), 316.0235 (100), 317.0289 (31.81), 463.0884 (29.92), 463.216 (12.17), 707.6393 (10.13) | myricitrin | C |
| 19 | 10.22 | 537.1622 | [M-H]- | 104.3845(2.69), 115.0185(2.85), 133.0288(51), 135.0444(20.27), 149.0235(3.81), 150.0318(20.46), 161.024(100), 162.0277(9.43), 163.04(3.01), 165.0553(5.41), 179.0346(7.53), 192.5509(3.44), 250.4877(3.41), 285.6566(3.23), 489.1359(5.28), 537.1621(7.03), | (1S,4aS,7S,7aS)-1-[(2S,3R,4S,5S,6R)-6-[[(E)-3-(3,4-dihydroxyphenyl)prop-2-enoyl]oxymethyl]-3,4,5-trihydroxyoxan-2-yl]oxy-7-hydroxy-7-methyl-4a,5,6,7a-tetrahydro-1H-cyclopenta[c]pyran-4-carboxylic acid | A |
| 20 | 11.12 | 463.0887,927.1846 | [M-H]-,[2M-H]- | 107.0132 (5.33), 108.0208 (3.23), 121.0288 (3.25), 148.016 (3.36), 151.0034 (13.24), 163.0032 (6.43), 178.9982 (3.47), 227.035 (4.36), 243.0301 (17.32), 244.0342 (4.32), 254.0231 (3.21), 255.0302 (43.06), 256.0337 (7.68), 271.0252 (100), 272.0288 (17.87), 299.0169 (2.95), 300.028 (90.19), 301.0343 (36.25), 463.0892 (21.03), 464.0913 (6.43) | Isoquercitrin | C |
| 21 | 12.00 | 477.0676, 955.1424,1433.2186 | [M-H]-,[2M-H]-,[3M-H]- | 107.0129 (35.5), 109.0285 (22.07), 121.0287 (22.93), 149.0241 (7.37), 151.0031 (88.56), 163.0032 (14.3), 178.998 (30.98), 211.0402 (9.49), 227.0348 (6.71), 229.0505 (6.07), 245.0448 (14.25), 255.0299 (15.02), 273.0411 (7.33), 301.0358 (100), 302.0405 (17.64), 477.0698 (7.87) | quercetin-7-*O*-glucuronide | C |
| 22 | 12.30 | 463.0888 | [M-H]- | 107.0131 (4.38), 108.0208 (4.53), 109.0286 (4.63), 121.0285 (3.67), 151.0031 (14.87), 163.0033 (4.06), 178.9982 (5.09), 226.0271 (3.74), 227.0349 (5.14), 243.0305 (22.03), 254.0226 (3.49), 255.0301 (41.98), 256.0334 (8.65), 271.0251 (100), 272.0297 (18.45), 300.028 (79.84), 301.0334 (30.22), 302.0379 (4.6), 463.089 (18.16), 464.0916 (4.48) | hyperoside | C |
| 23 | 14.82 | 433.0782 | [M-H]- | 108.0208 (8.28), 133.0284 (3.54), 151.0027 (6.03), 152.0108 (6.03), 161.0238 (7.03), 173.0453 (9.84), 191.0553 (16.05), 242.058 (3.55), 243.0301 (11.6), 254.0215 (3.52), 255.0299 (29.35), 271.0251 (66.64), 272.0293 (12.52), 300.0276 (100), 301.0329 (25.97), 302.0383 (3.61), 433.0775 (19.85), 434.0797 (3.44), 718.6069 (3.57) | kaempferol-3-*O*-arapyranoside | C |
| 24 | 15.21 | 447.0938 | [M-H]- | 107.0134 (1.4), 151.0022 (1.47), 163.0031 (1.77), 183.0454 (1.8), 185.0592 (1.73), 187.0401 (1.55), 211.0396 (2.58), 227.0349 (88.7), 228.0383 (14.06), 229.0507 (3.15), 239.0365 (1.34), 255.0301 (100), 256.0343 (18.66), 257.041 (2.56), 271.1986 (1.44), 284.033 (52.82), 285.0388 (22.5), 286.0425 (3.5), 447.094 (20.11), 448.094 (5.63) | Kaempferol-3-*O*-glucoside | C |
| 25 | 15.55 | 461.0732 | [M-H]- | 107.0133 (4.46), 113.0236 (5.25), 135.0081 (4.99), 143.0495 (5.46), 159.0443 (4.87), 163.0035 (4.98), 185.06 (10.28), 187.04 (14.17), 211.04 (6.45), 227.0359 (8.57), 229.0507 (34.12), 257.0461 (13.88), 285.0408 (100), 286.0451 (18.03) | Kaempferol-7-*O*-glucuronide | C |
| 26 | 17.31 | 515.1197 | [M-H]- | 111.0442(6.6), 127.0389(2.44), 133.0287(8.23), 134.0368(5.05), 135.0445(100), 136.0479(9.69), 137.0237(5.45), 155.0346(6.44), 161.0239(17.91), 173.0451(33.01), 179.0345(42.28), 191.0557(63), 191.0732(3.24), 192.0591(5.02), 353.0874(8.81), 515.1187(5.02) | 1,5-di-caffeoyl quinic acid | D |
| 27 | 17.32 | 447.0937 | [M-H]- | 151.0031 (8.21), 163.0035 (5.03), 187.0402 (3.5), 211.0391 (3.32), 227.035 (79.93), 228.0384 (12.67), 229.051 (4.12), 243.0305 (7.96), 255.03 (100), 256.0345 (17.67), 257.0407 (3.76), 271.0254 (33.1), 272.029 (6.45), 284.0329 (40.81), 285.0393 (24.99), 286.0435 (6.12), 300.0283 (27.94), 301.0338 (15.52), 447.0935 (20.93), 448.0967 (8.63) | Quercitrin | C |
| 28 | 17.39 | 461.0728, 923.6545, 1385.2324 | [M-H]-,[2M-H]-,[3M-H]- | 107.0128 (7.25), 143.0493 (7.21), 159.0443 (6.4), 185.0606 (12.44), 187.0394 (15.75), 189.0554 (5.65), 211.0406 (8.01), 213.0559 (6.08), 227.0352 (14.19), 229.0504 (30.85), 230.0547 (7.81), 255.0299 (5.47), 257.0454 (16.02), 285.0407 (100), 286.0434 (19.64) | Kaempferol-7-*O*-glucuronide | C |
| 29 | 19.41 | 491.0838 | [M-H]- | 107.0131 (50.9), 109.0286 (52.33), 119.0493 (28.95), 121.029 (37.73), 125.0235 (47.75), 145.0288 (43.28), 149.0233 (25.36), 149.9956 (34.08), 151.0033 (95.81), 168.0059 (42.29), 176.8382 (18.81), 178.9987 (37), 255.0306 (21.89), 301.0346 (100), 302.0391 (18.86), 344.1245 (23.09), 345.1284 (22.71), 491.1936 (26.99) | Isorhamnetin 3-*O*-glucuronide | C |
| 30 | 20.24 | 489.1046 | [M-H]- | 109.0288 (8.55), 109.5337 (8.31), 135.0447 (8.39), 145.228 (8.16), 160.9975 (8.32), 188.3897 (8.52), 227.0359 (30.41), 241.0503 (100), 242.0547 (12.83), 255.0302 (9.96), 269.0464 (59.38), 298.049 (24.63), 299.0538 (10), 315.185 (10.66), 324.0273 (10.1), 379.7712 (9.93) | 2''-Acetylastragalin | C |
| 31 | 21.13 | 515.1198 | [M-H]-, [2M-H]- | 111.0443(11.65), 133.0289(3.4), 135.0444(100), 136.0477(11.43), 137.0238(7.38), 155.0346(5.52), 161.0241(7.86), 173.045(86.98), 174.0486(5.3), 179.0346(61.75), 180.0384(6.22), 191.0558(54.92), 192.0596(6.25), 353.0882(18.44), 354.0908(3.56) | 3,4-di-caffeoyl quinic acid | D |
| 32 | 21.14 | 353.0879 | [M-H]- | 107.8083(13.49), 134.0367(17.49), 135.0443(100), 154.5918(14.5), 173.0453(54.3), 179.0354(21.24), 187.5145(15.28), 191.0559(63.9) | 4-caffeoyl quinic acid | D |
| 33 | 21.47 | 431.0986, 467.0754, 477.1043, 863.2044 | [M-H]- | 107.0128 (2.77), 135.0079 (4.26), 163.0031 (3.57), 183.0445 (3.48), 185.0605 (2.94), 187.0397 (4.73), 211.0399 (4.29), 213.0555 (3.48), 227.035 (73.33), 228.0384 (14.35), 229.0508 (16.78), 239.0346 (2.85), 255.0301 (100), 256.0346 (20.39), 257.0456 (8.47), 284.033 (47.8), 285.0404 (52.41), 286.0442 (11.7), 431.0998 (13.68) | afzelin | C |
| 34 | 21.47 | 499.0866 | [M-H]- | 111.0443(9.02), 119.0495(18.93), 135.0445(23.47), 137.0237(8.12), 155.0342(10.05), 161.0237(15.63), 163.0395(21.52), 173.045(100), 174.0483(8.91), 179.0348(11.14), 191.0556(30.39), 227.0354(7.4), 229.0505(6.33), 255.0301(15.59), 284.033(20.25), 285.0402(26.07), 337.0934(10.92), 431.0989(8.82), 499.1213(6.59) | caffeoyl quinic acid-glucoside | D |
| 35 | 21.47 | 499.1249 | [M-H]- | 111.0441(12.17), 119.0494(31.02), 133.0288(8.69), 135.0445(39.81), 137.024(10.83), 155.0339(11.84), 161.0241(15.98), 163.0394(20.02), 173.045(100), 174.0491(9.06), 179.0345(13.27), 191.0559(36.02), 227.0349(12.84), 229.0505(6.67), 255.03(22.94), 284.0327(18.65), 285.0401(26.47), 337.0944(12.28) | 1-coumaroyl-4-caffeoyl quinic acid | D |
| 36 | 23.63 | 301.0358 | M-H | 107.0129 (51.86), 109.0287 (7.29), 121.0287 (40.28), 121.0369 (3.27), 139.0395 (5.83), 149.0236 (8.31), 151.0031 (100), 152.0063 (9.15), 161.024 (4.4), 163.0034 (3.31), 164.0112 (4.31), 169.0142 (4.19), 178.998 (21.94), 245.0458 (3.61), 301.0356 (30.81), 302.0391 (6.46) | Quercetin | C |
| 37 | 23.92 | 499.1253 | [M-H]- | 111.0443(9.86), 127.0395(4.17), 134.0368(3.93), 135.0444(100), 136.0479(7.92), 137.0238(8.99), 155.0343(4.58), 161.0238(9.28), 173.0451(87.08), 174.0488(7.14), 179.0347(58.44), 180.0375(4.85), 191.0557(61.78), 192.0588(5.55), 353.0887(17.19) | 1-coumaroyl-3-caffeoyl quinic acid | D |
| 38 | 23.93 | 475.0888 | [M-H]- | 170.051 (5.33), 177.9305 (5.29), 227.0349 (100), 228.0386 (18.13), 241.7474 (6.03), 255.0303 (99.07), 256.035 (15.25), 284.0334 (44.65), 285.039 (16.08), 349.0445 (5.96), 426.7868 (5.99), 431.0985 (14.86), 475.0862 (12.08) | Kaempferide 3-*O*-Glucuronide | C |
| 39 | 24.16 | 515.1202 | [M-H]- | 111.0077(3.74), 111.0443(7.17), 133.0289(6.41), 134.0366(6.23), 135.0444(100), 136.0473(9.05), 137.0236(6.47), 161.0236(14.27), 173.045(61.63), 174.0483(4.7), 175.0393(4.56), 179.0346(53.08), 180.0378(6.85), 191.0556(50.21), 353.0883(13.94), | 4,5-di-*O*-caffeoyl quinic acid | D |
| 40 | 26.09 | 575.1416 | [M-H]- | 101.0236 (17.94), 135.0268 (20.29), 145.0294 (14.78), 161.0239 (12.53), 192.7365 (13.19), 227.0359 (35.76), 229.0503 (20.99), 255.0294 (80.03), 257.0477 (13.31), 284.0333 (53.41), 285.0408 (100), 286.044 (29.32), 465.8788 (13.26), 530.0027 (15.09), 575.1456 (12.69) | 3-[2-O-(4-Deoxy-4-oxo-alpha-L-rhamnopyranosyl)-alpha-L-rhamnopyranosyloxy]-4',5,7-trihydroxyflavone | C |
| 41 | 27.87 | 473.1095 | [M-H]- | 107.0129 (3.73), 135.008 (2.33), 151.0037 (2.32), 157.0653 (2.93), 163.0031 (4.32), 185.0603 (3.84), 187.0401 (4.72), 211.0396 (4.69), 227.035 (73.84), 228.0388 (9.86), 229.0512 (14.81), 255.0302 (100), 256.0345 (16.45), 257.0463 (8.63), 284.0332 (48.68), 285.0402 (52.96), 286.0435 (7.84), 473.1096 (15.48), 474.1149 (4.6) | 4''-*O*-Acetylafzelin | C |
| 42 | 28.50 | 285.0409 | [M-H]- | 107.0129 (3.19), 109.0285 (2.53), 117.0339 (2.62), 135.008 (3.36), 143.0498 (4.53), 151.0026 (2.98), 154.0416 (2.88), 157.0653 (3.23), 159.0448 (5.01), 169.0656 (3), 171.0447 (3.63), 185.0607 (5.93), 187.0397 (4.68), 211.0399 (4.62), 213.0559 (2.7), 229.0502 (3.97), 239.0353 (3.82), 285.0409 (100), 286.0445 (18.54) | kaempferol | C |

A: caffeoyl derivatives; B: coumaroyl derivatives; C: flavonoids; D: quinic acid derivatives

**Fig. S1** The structure of (1S,4aS,7S,7aS)-1-[(2S,3R,4S,5S,6R)-6-[[(E)-3-(3,4-dihydroxyphenyl)prop-2-enoyl]oxymethyl]-3,4,5-trihydroxyoxan-2-yl]oxy-7-hydroxy-7-methyl-4a,5,6,7a-tetrahydro-1H-cyclopenta[c]pyran-4-carboxylic acid. The unit of caffeoyl glucoside in compounds were marked in red.
